# Supplementary material for: Molecular and phenotypic diversity of CBLmutated juvenile myelomonocytic leukemia
Source: PubMed Central journal article supplement — Haematologica. 2020 Dec 30;107(1):178–86. doi: 10.3324/haematol.2020.270595 (PMC8719097; doi:10.3324/haematol.2020.270595), 2020-12-30
Supplement: 2020_270595_HECHT_SUPPL.pdf [file 2020_270595_HECHT_SUPPL.pdf]

## Molecular and phenotypic diversity of *CBL*-mutated juvenile myelomonocytic leukemia

Anna Hecht,<sup>1,2</sup> Julia A. Meyer,<sup>1</sup> Astrid Behnert,<sup>1</sup> Eric Wong,<sup>1</sup> Farid Chehab,<sup>3</sup> Adam Olshen,<sup>4,5</sup> Aaron Hechmer,<sup>4</sup> Catherine Afandilian,<sup>6</sup> Rukhmi Bhat,<sup>7</sup> Sung Won Choi,<sup>8</sup> Satheesh Chonat,<sup>9</sup> Jason E. Farrar,<sup>10</sup> Mark Fluchel,<sup>11</sup> Haydar Frangoul,<sup>12</sup> Jennifer H. Han,<sup>13</sup> Edward A. Kolb,<sup>14</sup> Dennis J. Kuo,<sup>13</sup> Margaret L. MacMillan,<sup>15</sup> Luke Maese,<sup>16</sup> Kelly W. Maloney,<sup>17</sup> Aru Narendran,<sup>18</sup> Benjamin Oshrine,<sup>19</sup> Kirk R. Schultz,<sup>20</sup> Maria L. Sulis,<sup>21</sup> David Van Mater,<sup>22</sup> Sarah K. Tasian,<sup>23</sup> Wolf-Karsten Hofmann,<sup>2</sup> Mignon L. Loh<sup>1,4</sup> and Elliot Stieglitz<sup>1,4</sup>

<sup>1</sup>Department of Pediatrics, Benioff Children's Hospital, University of California San Francisco, San Francisco, CA, USA; <sup>2</sup>Department of Hematology/Oncology, University Hospital Mannheim, Heidelberg University, Heidelberg, Germany; <sup>3</sup>Department of Laboratory Medicine, University of California San Francisco, San Francisco, CA, USA; <sup>4</sup>Helen Diller Family Comprehensive Cancer Center, University of California San Francisco, San Francisco, CA, USA; <sup>5</sup>Department of Epidemiology and Biostatistics, University of California San Francisco, San Francisco, CA, USA; <sup>6</sup>Pediatric Hematology/Oncology, Stanford University, Stanford, CA, USA; <sup>7</sup>Northwestern University Feinberg School of Medicine, Ann & Robert H. Lurie Children's Hospital of Chicago, Chicago, IL, USA; <sup>8</sup>Blood and Marrow Transplantation Program, University of Michigan, Ann Arbor, MI, USA; <sup>9</sup>Department of Pediatrics, Emory University School of Medicine, Aflac Cancer and Blood Disorders Center, Children's Healthcare of Atlanta, Atlanta, GA, USA; <sup>10</sup>Arkansas Children's Research Institute, Department of Pediatrics, University of Arkansas for Medical Sciences, Little Rock, AR, USA; <sup>11</sup>University of Utah, Department of Pediatrics, Division of Pediatric Hematology-Oncology, Salt Lake City, UT, USA; <sup>12</sup>The Children's Hospital at TriStar Centennial and Sarah Cannon Research Institute, Nashville, TN, USA; <sup>13</sup>Division of Pediatric Hematology-Oncology, University of California San Diego/Rady Children's Hospital San Diego, CA, USA; <sup>14</sup>Nemours Center for Cancer and Blood Disorders/Alfred I. DuPont Hospital for Children, Wilmington, DE, USA; <sup>15</sup>Blood and Marrow Transplant Program, Department of Pediatrics, University of Minnesota Medical School, Minneapolis, MN, USA; <sup>16</sup>Department of Pediatrics and Huntsman Cancer Institute, University of Utah, Salt Lake City, UT, USA; <sup>17</sup>Children's Hospital Colorado, Aurora, CO, USA; <sup>18</sup>Pediatric Hematology and Oncology, Alberta Children's Hospital, Calgary, Alberta, Canada; <sup>19</sup>Johns Hopkins All Children's Hospital, St. Petersburg, FL, USA; <sup>20</sup>British Columbia Children's Hospital and Research Institute, Vancouver, British Columbia, Canada; <sup>21</sup>Department of Pediatrics, Memorial Sloan Kettering Cancer Center, New York, NY, USA; <sup>22</sup>Department of Pediatrics, Duke University Medical Center, Durham, NC, USA and <sup>23</sup>Division of Oncology and Center for Childhood Cancer Research, Children's Hospital of Philadelphia; Department of Pediatrics and Abramson Cancer Center, University of Pennsylvania Perelman School of Medicine, Philadelphia, PA, USA.

©2022 Ferrata Storti Foundation. This is an open-access paper. doi:10.3324/haematol.2020.270595

Received: August 25, 2020.

Accepted: December 21, 2020.

Pre-published: December 30, 2020.

Correspondence: *ELLIOT STIEGLITZ* - [elliott.stieglitz@ucsf.edu](mailto:elliott.stieglitz@ucsf.edu)

**Supplemental Material for Manuscript “Molecular and phenotypic diversity of *CBL*-mutated juvenile myelomonocytic leukemia”:**

**Supplementary Table 1.** Genes covered in our custom JMML amplicon next-generation sequencing panel. Sequencing either covered the full length of the gene (“full”) or hotspot locations of known mutations (“hotspot”).

| <b>Gene</b> | <b>Type</b> |
|-------------|-------------|
| ASXL1       | hotspot     |
| BRAF        | hotspot     |
| CBL         | hotspot     |
| DNMT3A      | full        |
| ETV6        | full        |
| EZH2        | full        |
| FLT3        | hotspot     |
| GATA2       | full        |
| JAK3        | full        |
| KRAS        | hotspot     |
| MAP2K1      | hotspot     |
| NF1         | full        |
| NRAS        | hotspot     |
| PTPN11      | hotspot     |
| RAC2        | full        |
| RAF1        | full        |
| RIT1        | full        |
| RRAS        | full        |
| RRAS2       | hotspot     |
| RUNX1       | full        |
| SAMD9       | full        |
| SAMD9L      | full        |
| SETBP1      | hotspot     |
| SH2B3       | full        |
| SOS1        | full        |
| ZRSR2       | full        |

**Supplementary Figure 1:** Kaplan Meier survival curves of somatic only (orange) and germline CBL (purple) patients.

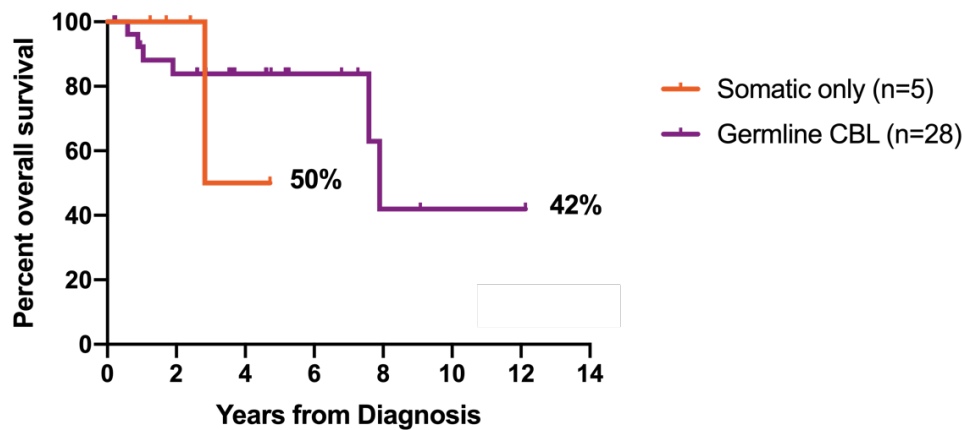

**Additional patient vignettes:**

**Vignette 4: UPN2951**

*Patient was first noted to have an enlarged spleen by his pediatrician at 9 months of age. A CBC at that time revealed mild anemia and thrombocytopenia, as well as few circulating myeloid precursors and blasts. At 13 months of age, he developed a mild leukocytosis to  $17 \times 10^9/L$  with monocytosis of  $4 \times 10^9/L$ . The patient was identified to have a germline CBL p.C384R alteration with LOH in his bone marrow. The patient was started on 6-mercaptopurine for failure-to-thrive when he was 18 months and continued on the medication for nearly two years. He subsequently discontinued 6-mercaptopurine due to progressive splenomegaly and severe pruritis. Four subsequent months of ruxolitinib treatment did not improve splenomegaly or the allele frequency of the somatic*

*component of his CBL mutation. He was then admitted for cytotoxic chemotherapy with fludarabine and cytarabine for two cycles due to massive splenomegaly. The patient had a mild reduction in his splenomegaly and no reduction in the allele burden of his somatic CBL mutation. The patient is remains symptomatic with splenomegaly, pruritus, and episodic weakness and under current evaluation for splenectomy and/or hematopoietic stem cell transplantation.*

***Vignette 5: UPN2923***

*A 1 month-old male with no dysmorphic features was found to have splenomegaly on routine examination. A CBC revealed a WBC of  $57 \times 10^9/L$ , a hemoglobin of 8.7g/dL, and platelets of  $50 \times 10^9/L$ . The patient had leukoerythroblastosis with 25% monocytes, metamyelocytes, promyelocytes, myelocytes, and blasts in his circulating blood. He was found to have a heterozygous germline CBL p.C381R mutation, which was homozygous in the bone marrow. All other testing, including cytogenetics and FISH analysis for MDS/AML translocations and monosomies, were negative. The patient was treated with hydroxyurea and cytarabine and was transplanted at 4 months of life using busulfan, cyclophosphamide, and melphalan conditioning using a matched sibling donor who tested negative for the same CBL mutation. The patient had secondary graft failure at two months post-transplant (100% host chimerism), but now has normal bone marrow morphology and is transfusion-independent despite having mild persistent splenomegaly at 2 cm below the left costal margin. This child has recently been noted to have developmental delay.*

**Vignette 6: UPN3080**

*This patient was noted to have splenomegaly at 12 months of life first detected at a routine pediatrician visit. The initial CBC was remarkable for an elevated WBC of  $60 \times 10^9/L$ , with a monocytosis of  $22 \times 10^9/L$ . Hemoglobin was low at 9 g/dL, and his platelets were normal. His fetal hemoglobin was normal at 1.9%. Molecular testing for JMML revealed a somatic-only CBL mutation (c.1111T>C) Y371H at 96%. Germline testing using a buccal swab tissue specimen was negative for CBL mutations.*

*The patient was then treated with single agent azacitidine, which resulted in clinical improvements in his WBC and decreased spleen size, but no response at the molecular level. After 6 cycles of azacitidine, he experienced worsening splenomegaly and was treated with one cycle of fludarabine and cytarabine, but did not have any appreciable benefit. The patient is currently preparing to receive a hematopoietic stem cell transplant.*

**Vignette 7: UPN2921**

*A previously healthy 9 month-old girl with no congenital anomalies presented with left hand swelling and bruising and a high fever. Her CBC revealed a WBC of  $33 \times 10^9/L$ , hemoglobin of 8.4 and platelets of  $36 \times 10^9/L$ . Her monocyte count was  $15 \times 10^9/L$ . Bone marrow examination including BCR/ABL1 testing and cytogenetics/FISH were normal. Sequencing revealed a homozygous CBL p.Y371C mutation in her bone marrow and a heterozygous germline mutation. Her spleen was palpable 3 cm below the left costal margin. She experienced several soft tissue infections that resolved with antibiotics. She was started on 6-mercaptopurine and had improvement in her*

*splenomegaly and normalization of her platelets. The patient was tapered off of 6-mercaptopurine at 3 years of age, but experienced recurrent thrombocytopenia splenomegaly within two months, and treatment was thus restarted.*

## **Supplementary methods:**

### **Next-generation sequencing of JMML-associated mutations**

Genomic DNA samples were sequenced using a custom amplicon-based sequencing approach (Paragon Genomics, Hayward, CA, USA) targeting 26 genes that are known to be recurrently mutated in JMML<sup>1</sup> (Supplementary Table 1). Libraries were assessed using the Bioanalyzer High Sensitivity DNA Analysis kit (Agilent, Santa Clara, CA, USA) and quantified using Qubit (Thermo Fisher Scientific, Waltham, MA, USA). Samples were then sequenced on a MiSeq platform (Illumina, San Diego, CA, USA) at 992X mean coverage. A VAF of 0.05 (=5%) at diagnosis was required for reporting.

### **Targeted MethySeq library preparation and sequencing**

Genomic DNA (300 ng) was bisulfite converted using the TrueMethyl oxBS Module according to protocol (Tecan, Switzerland). Converted ssDNA was quantified using the Qubit ssDNA assay and 100 ng used as input for a custom 3000 CpG loci targeted MethySeq assay (Tecan). Final libraries were quality checked using the Bioanalyzer High Sensitivity DNA Analysis kit and quantified using the Qubit HS assay. Single-index library pools were sequenced on the Illumina NovaSeq with paired-end 150 base-pair (bp) mode averaging 20 million reads per library prep.

## **MethylSeq hierarchical clustering**

Sequence reads were trimmed using Cutadapt<sup>2</sup>, and DNA methylation status was called using Bismark<sup>3</sup>. CpGs that had  $\leq 50$ x median coverage were removed from downstream analysis, resulting in 93 CpG sites removed. Minimum distance to the centroid was used to classify samples into one of three DNA methylation subgroups based on a 1386 CpG loci consensus signature that was identified from an international JMML cohort<sup>4</sup>.

1. Hecht A, Meyer J, Chehab FF, et al. Molecular assessment of pretransplant chemotherapy in the treatment of juvenile myelomonocytic leukemia. *Pediatr Blood Cancer*. 2019;66(11):e27948.
2. Martin M. Cutadapt removes adapter sequences from high-throughput sequencing reads. 2011. 2011;17(1):3.
3. Krueger F, Andrews SR. Bismark: a flexible aligner and methylation caller for Bisulfite-Seq applications. *Bioinformatics*. 2011;27(11):1571-1572.
4. Schönung M, Meyer J, Nöllke P, et al. International consensus definition of DNA methylation subgroups in juvenile myelomonocytic leukemia. *Clin Cancer Res*. in press;

| Supplementary Table 2. Complete clinical data of all patients. |      |              |        |                          |                                        |                                              |                        |
|----------------------------------------------------------------|------|--------------|--------|--------------------------|----------------------------------------|----------------------------------------------|------------------------|
| Project ID                                                     | UPN  | CBL category | Gender | Age at Diagnosis (years) | WBC at Diagnosis (x10 <sup>9</sup> /l) | Platelets at Diagnosis (x10 <sup>9</sup> /l) | Hb at Diagnosis (g/dl) |
| 1                                                              | 2025 | CBL syndrome | Male   | 0.9                      | 38.5                                   | 189                                          | 9.5                    |
| 2                                                              | 1778 | CBL syndrome | Male   | 1.8                      | 19                                     | 105                                          | 10.9                   |
| 3                                                              | 2057 | CBL syndrome | Male   | 2.3                      |                                        |                                              |                        |
| 4                                                              | 2056 | CBL syndrome | Male   | 2.3                      |                                        |                                              |                        |
| 5                                                              | 2921 | CBL syndrome | Female | 0.8                      | 36.35                                  | 59                                           | 9.1                    |
| 6                                                              | 2010 | CBL syndrome | Female | 1.3                      | 29.2                                   | 68                                           | 10.3                   |
| 7                                                              | 2309 | CBL syndrome | Female | 1.1                      | 73.1                                   | 57                                           | 9.9                    |
| 8                                                              | 1241 | CBL syndrome | Female | 0.6                      | 43                                     | 62                                           | 9.2                    |
| 9                                                              | 2903 | Somatic only | Female | 3.5                      | 33.4                                   | 109                                          | 11.7                   |
| 10                                                             | 2515 | CBL syndrome | Female | 1.7                      |                                        |                                              |                        |
| 11                                                             | 1333 | CBL syndrome | Male   | 0.6                      | 35.6                                   | 46                                           | 8.2                    |
| 12                                                             | 1125 | CBL syndrome | Female | 1.2                      | 196                                    | 47                                           | 6.2                    |
| 13                                                             | 2951 | CBL syndrome | Male   | 1.1                      | 17.5                                   | 102                                          | 10.3                   |
| 14                                                             | 2949 | CBL syndrome | Female | 25.3                     |                                        |                                              |                        |
| 15                                                             | 1886 | CBL syndrome | Female | 0.2                      | 21                                     | 204                                          | 11.7                   |
| 16                                                             | 2178 | CBL syndrome | Female | 0.8                      | 35                                     | 10                                           | 6.4                    |
| 17                                                             | 2208 | CBL syndrome | Female | 0.5                      | 21                                     | 71                                           | 9.9                    |
| 18                                                             | 2960 | CBL syndrome | Female | 2.0                      | 21.96                                  | 180                                          | 10.5                   |
| 19                                                             | 2977 | CBL syndrome | Female | 0.8                      | 52                                     | 59                                           | 7.4                    |
| 20                                                             | 2760 | CBL syndrome | Female | 1.5                      | 122                                    | 47                                           | 9.2                    |



| Supplementary |                       |              |            |              |                             |                                                                                                                                                                                                                                                                                                                         |
|---------------|-----------------------|--------------|------------|--------------|-----------------------------|-------------------------------------------------------------------------------------------------------------------------------------------------------------------------------------------------------------------------------------------------------------------------------------------------------------------------|
| Project ID    | Hemoglobin F Category | Cytogenetics | Monosomy 7 | Splenomegaly | Dysmorphic features present | Specification of dysmorphic features                                                                                                                                                                                                                                                                                    |
| 1             | Normal                | Normal       | No         | Yes          | No                          |                                                                                                                                                                                                                                                                                                                         |
| 2             | Normal                | Normal       | No         | Yes          | Yes                         | Pectus excavatum, Feet pronation, Some gross motor delay                                                                                                                                                                                                                                                                |
| 3             |                       |              |            | Yes          | Yes                         | Short stature, short neck, low set ears, hat nasal bridge telorism, hypospadias                                                                                                                                                                                                                                         |
| 4             |                       | Normal       | No         | Yes          | Yes                         | Hypertelorism, short stature, webbed neck, low set ears; choanal atresia                                                                                                                                                                                                                                                |
| 5             | Not Available         | Normal       | No         | Yes          | No                          |                                                                                                                                                                                                                                                                                                                         |
| 6             | Elevated              | Normal       | No         | Yes          | No                          |                                                                                                                                                                                                                                                                                                                         |
| 7             | Normal                | Normal       | No         | Yes          | N/A                         |                                                                                                                                                                                                                                                                                                                         |
| 8             | Normal                | Normal       | No         | Yes          | No                          |                                                                                                                                                                                                                                                                                                                         |
| 9             | Elevated              | Normal       | No         | Yes          | Yes                         | Examination shows an inner canthal distance of 3.3 centimeters, which is greater than 2 standard deviations above the mean. Bilateral epicanthal folds present with mild eyelid ptosis and mildly up-slanting palpebral fissures. Ears are mildly low-set and posteriorly rotated with a slightly thickened upper helix |
| 10            |                       |              |            |              | No                          |                                                                                                                                                                                                                                                                                                                         |
| 11            | Normal                | Abnormal     | No         | Yes          |                             |                                                                                                                                                                                                                                                                                                                         |
| 12            | Not Available         | Normal       | No         | No           |                             |                                                                                                                                                                                                                                                                                                                         |
| 13            | Normal                | Normal       | No         | Yes          | Yes                         | Ptosis of right eye Hypotonia Persistent diffusion restriction at bilateral globus pallidi on MRI                                                                                                                                                                                                                       |
| 14            |                       |              |            |              |                             |                                                                                                                                                                                                                                                                                                                         |
| 15            | Normal                | Normal       | No         | Yes          | N/A                         |                                                                                                                                                                                                                                                                                                                         |
| 16            | Normal                | Normal       | No         | Yes          | No                          |                                                                                                                                                                                                                                                                                                                         |
| 17            | Normal                | Normal       | No         | Yes          | No                          |                                                                                                                                                                                                                                                                                                                         |
| 18            | Elevated              | Normal       | No         | Yes          | No                          |                                                                                                                                                                                                                                                                                                                         |
| 19            | Normal                | Normal       | No         | Yes          | No                          |                                                                                                                                                                                                                                                                                                                         |
| 20            | Normal                | Normal       | No         | Yes          | Yes                         | frontal bossing                                                                                                                                                                                                                                                                                                         |

| Supplementary |                                                                                                     |                                         |      |                 |                                               |
|---------------|-----------------------------------------------------------------------------------------------------|-----------------------------------------|------|-----------------|-----------------------------------------------|
| Project ID    | Other syndromic features                                                                            | Type of Chemotherapy besides transplant | HCT? | Type of HCT     | Type of Conditioning                          |
| 1             | Optic neuritis/vasculitis, resolved                                                                 | None                                    | No   |                 |                                               |
| 2             |                                                                                                     | None                                    | No   |                 |                                               |
| 3             | Renal dysplasia/hypoplasia; severe vesicoureteral reflux; hypothyroidism; seizure disorder          | None                                    | No   |                 |                                               |
| 4             | Chronic renal disease due to chronic severe vesicoureteral reflux; hypothyroidism; seizure disorder | None                                    | No   |                 |                                               |
| 5             |                                                                                                     | 6MP                                     | No   |                 |                                               |
| 6             |                                                                                                     | None                                    | Yes  | Unrelated Donor | Busulfan,Cyclophosphamide                     |
| 7             |                                                                                                     | Ara-C,13-CIS Retinoic Acid,Fludarabine  | Yes  | Unrelated Donor |                                               |
| 8             |                                                                                                     | Other                                   | Yes  |                 | Busulfan,Cyclophosphamide,Thiotepa            |
| 9             |                                                                                                     | Other                                   | Yes  | Cord            | Busulfan,Cyclophosphamide,Melphalan           |
| 10            | Hypothyroidism; bilateral foot eversion                                                             | 6MP                                     | Yes  | Family Donor    | Busulfan,Melphalan                            |
| 11            |                                                                                                     | None                                    | Yes  |                 |                                               |
| 12            |                                                                                                     |                                         | Yes  |                 |                                               |
| 13            | Generalized hypotonia, feeding difficulties, failure to thrive; Brachycephaly                       | 6MP,Ara-C, Fludarabine,Ruxolitinib      | No   |                 |                                               |
| 14            |                                                                                                     |                                         |      |                 |                                               |
| 15            | Usher's syndrome: Retinitis pigmentosa, progressive vision loss; profound sensorineural deafness    | None                                    | No   |                 |                                               |
| 16            |                                                                                                     | None                                    | Yes  | Cord            | Busulfan,Melphalan,Fludarabine                |
| 17            | ASD; short stature                                                                                  | 6MP,Ara-C                               | Yes  | Unrelated Donor | Busulfan,Fludarabine,ATG                      |
| 18            |                                                                                                     | None                                    |      |                 |                                               |
| 19            |                                                                                                     | 6MP,Ara-C, Fludarabine,Azacitidine      | Yes  | Haploidentical  | Busulfan,Cyclophosphamide,Melphalan,Rituximab |
| 20            |                                                                                                     | 6MP                                     | No   |                 |                                               |

| Supplementary |                                                                             |                         |
|---------------|-----------------------------------------------------------------------------|-------------------------|
| Project ID    | Outcome                                                                     | Inheritance of mutation |
| 1             | Spontaneous remission                                                       | De Novo                 |
| 2             | Spontaneous remission                                                       | Unknown                 |
| 3             | Persistent Disease, untransplanted;<br>Death from multi-organ complications | De novo                 |
| 4             | Persistent Disease, untransplanted;<br>Death from multi-organ complications | De novo                 |
| 5             | Persistent Disease, untransplanted                                          | Father                  |
| 6             | Remission after transplant                                                  |                         |
| 7             | Remission after transplant                                                  | Mother                  |
| 8             | Relapse                                                                     | De novo                 |
| 9             | TRM                                                                         | N/A                     |
| 10            | Remission after transplant                                                  | Unknown                 |
| 11            | Relapse                                                                     | Mother                  |
| 12            | TRM                                                                         | Mother                  |
| 13            | Persistent Disease, untransplanted                                          | Father                  |
| 14            | Lost to follow-up                                                           | Unknown                 |
| 15            | Spontaneous remission                                                       | Unknown                 |
| 16            | Remission after transplant                                                  | De Novo                 |
| 17            | Remission after transplant                                                  |                         |
| 18            | Persistent Disease, untransplanted                                          | De Novo                 |
| 19            | Remission after transplant                                                  | Unknown                 |
| 20            | Persistent Disease, untransplanted                                          | De novo                 |

| Supplementary Table 2. Complete clinical data of all patients. |      |              |        |                          |                                        |                                              |                        |
|----------------------------------------------------------------|------|--------------|--------|--------------------------|----------------------------------------|----------------------------------------------|------------------------|
| Project ID                                                     | UPN  | CBL category | Gender | Age at Diagnosis (years) | WBC at Diagnosis (x10 <sup>9</sup> /l) | Platelets at Diagnosis (x10 <sup>9</sup> /l) | Hb at Diagnosis (g/dl) |
| 21                                                             | 2786 | CBL syndrome | Male   | 0.6                      | 21.7                                   | 83                                           |                        |
| 22                                                             | 2811 | Somatic only | Female | 1.1                      | 24.1                                   | 95                                           |                        |
| 23                                                             | 2923 | CBL syndrome | Male   | 0.1                      | 57                                     | 50                                           | 8.7                    |
| 24                                                             | 2985 | Somatic only | Female | 0.9                      | 81.9                                   | 42                                           | 10.4                   |
| 25                                                             | 3003 | CBL syndrome | Female | 0.7                      | 80                                     | 161                                          | 10.3                   |
| 26                                                             | 3074 | Somatic only | Male   | 0.6                      | 88                                     |                                              |                        |
| 27                                                             | 3029 | CBL syndrome | Male   | 2.1                      | 6.85                                   | 17                                           | 8.7                    |
| 28                                                             | 3082 | CBL syndrome | Male   | 0.1                      | 20                                     |                                              |                        |
| 29                                                             | 3080 | Somatic only | Male   | 1.0                      | 43                                     | 167                                          | 8.9                    |
| 30                                                             | 3102 | CBL syndrome | Female | 1.7                      | 20                                     | 58                                           | 10.1                   |
| 31                                                             | 3110 | CBL syndrome | Male   | 1.2                      | 34.2                                   | 133                                          | 9.1                    |
| 32                                                             | 2357 | CBL syndrome | Male   | 0.7                      | 19.3                                   | 57                                           | 11.8                   |
| 33                                                             | 2980 | CBL syndrome | Female | 2.3                      | 18                                     | 115                                          | 10.7                   |

| Supplementary |                       |              |            |              |                             |                                      |
|---------------|-----------------------|--------------|------------|--------------|-----------------------------|--------------------------------------|
| Project ID    | Hemoglobin F Category | Cytogenetics | Monosomy 7 | Splenomegaly | Dysmorphic features present | Specification of dysmorphic features |
| 21            | Normal                | Normal       | No         | Yes          | Yes                         |                                      |
| 22            | Normal                | Normal       | No         |              |                             |                                      |
| 23            | Normal                | Normal       | No         | Yes          | No                          |                                      |
| 24            | Normal                | Normal       | No         | Yes          | No                          |                                      |
| 25            | Not Available         | Normal       | No         | Yes          | N/A                         |                                      |
| 26            |                       | Normal       | No         | Yes          |                             |                                      |
| 27            | Elevated              | Normal       | No         | Yes          | No                          |                                      |
| 28            |                       |              | No         | Yes          | N/A                         |                                      |
| 29            | Normal                | Normal       | No         | Yes          | No                          |                                      |
| 30            | Elevated              | Normal       | No         | Yes          | Yes                         | Mild hypertelorism                   |
| 31            | Elevated              | Normal       | No         | Yes          | No                          |                                      |
| 32            | Normal                | Normal       | No         | Yes          |                             |                                      |
| 33            | Normal                | Normal       | No         | Yes          | No                          |                                      |

| Supplementary |                                                                                                                                                                           |                                           |      |                |                                              |
|---------------|---------------------------------------------------------------------------------------------------------------------------------------------------------------------------|-------------------------------------------|------|----------------|----------------------------------------------|
| Project ID    | Other syndromic features                                                                                                                                                  | Type of Chemotherapy besides transplant   | HCT? | Type of HCT    | Type of Conditioning                         |
| 21            |                                                                                                                                                                           | 6MP                                       | Yes  | Haploidentical | Busulfan,Cyclophosphamide,post-transplant Cy |
| 22            |                                                                                                                                                                           | 6MP,Ara-C,Fludarabine                     | Yes  | Family Donor   | Busulfan,Cyclophosphamide,Melphalan          |
| 23            |                                                                                                                                                                           | Ara-C,HU                                  | Yes  | Family Donor   | Busulfan,Cyclophosphamide,Melphalan          |
| 24            |                                                                                                                                                                           | Ara-C,Fludarabine                         | Yes  | Family Donor   | Busulfan,Cyclophosphamide,Melphalan          |
| 25            | Asthma                                                                                                                                                                    | 6MP                                       |      |                |                                              |
| 26            |                                                                                                                                                                           | Ara-C,Fludarabine,Trametinib              | No   |                |                                              |
| 27            |                                                                                                                                                                           | 6MP,Sirolimus                             | No   |                |                                              |
| 28            | Absence of thoracic duct, pulmonary stenosis, intestinal mal rotation, liver dysfunction, chronic respiratory failure, hydronephrosis, congenital nystagmus and esotropia | None                                      | No   |                |                                              |
| 29            |                                                                                                                                                                           | Ara-C, Fludarabine,Azacitidine,Trametinib | No   |                |                                              |
| 30            |                                                                                                                                                                           | None                                      | No   |                |                                              |
| 31            |                                                                                                                                                                           | 6MP                                       | No   |                |                                              |
| 32            |                                                                                                                                                                           |                                           | Yes  | Cord           |                                              |
| 33            |                                                                                                                                                                           | None                                      | No   |                |                                              |

| <b>Supplementary</b> |                                    |                                |
|----------------------|------------------------------------|--------------------------------|
|                      |                                    |                                |
| <b>Project ID</b>    | <b>Outcome</b>                     | <b>Inheritance of mutation</b> |
| 21                   | Remission after transplant         | Mother                         |
| 22                   | Remission after transplant         | N/A                            |
| 23                   | Remission after transplant         | Unknown                        |
| 24                   | Remission after transplant         | N/A                            |
| 25                   | Persistent Disease, untransplanted | Unknown                        |
| 26                   | Persistent Disease, untransplanted | N/A                            |
| 27                   | Persistent Disease, untransplanted | Father                         |
| 28                   | Multi-organ failure in infancy     | Unknown                        |
| 29                   | Persistent Disease, untransplanted | N/A                            |
| 30                   | Persistent Disease, untransplanted | Father                         |
| 31                   | Persistent Disease, untransplanted |                                |
| 32                   | Remission after transplant         | Unknown                        |
| 33                   | Persistent Disease, untransplanted | Unknown                        |

| Supplementary Table 3. Mutational data and methylation status of all patients. |      |                         |             |                       |                   |                                              |
|--------------------------------------------------------------------------------|------|-------------------------|-------------|-----------------------|-------------------|----------------------------------------------|
| Project ID                                                                     | UPN  | CBL Aberration          | Tumor VAF % | Germline heterozygous | Methylation group | Additional comments                          |
| 1                                                                              | 2025 | p.Y371H                 | 90          | positive              | low               |                                              |
| 2                                                                              | 1778 | p.Y371N                 | 90          | positive              | low               |                                              |
| 3                                                                              | 2057 | p.Q358fs                | 69          | positive              | low               |                                              |
| 4                                                                              | 2056 | p.Q358fs                | 81          | positive              | low               |                                              |
| 5                                                                              | 2921 | p.Y371C                 | 92          | positive              | low               |                                              |
| 6                                                                              | 2010 | p.C396R                 | 97          | positive              | low               |                                              |
| 7                                                                              | 2309 | p.Y371H                 | 94          | positive              | low               |                                              |
| 8                                                                              | 1241 | p.Y371H                 | 90          | positive              | low               |                                              |
| 9                                                                              | 2903 | p.Y371H                 | 72          | negative              | intermediate      | heterozygous RUNX1 p.R166Q found in germline |
| 10                                                                             | 2515 | del21bp intron 8-exon 8 | 75          | positive              | low               |                                              |
| 11                                                                             | 1333 | p.Y371H                 | 76          | positive              | intermediate      |                                              |
| 12                                                                             | 1125 | p.Y371H                 | 95          | positive              | low               |                                              |
| 13                                                                             | 2951 | p.C384R                 | 89          | positive              | low               |                                              |
| 14                                                                             | 2949 | p.C396R                 | 99          | positive              | low               |                                              |
| 15                                                                             | 1886 | exon 8 del              | 1 copy loss | positive              | low               |                                              |
| 16                                                                             | 2178 | p.Y371H                 | 97          | positive              | low               |                                              |
| 17                                                                             | 2208 | p.C384G                 | 97          | positive              | low               |                                              |
| 18                                                                             | 2960 | p.C381Y                 | 84          | positive              | low               |                                              |
| 19                                                                             | 2977 | p.Y371H                 | 91          | positive              | low               |                                              |
| 20                                                                             | 2760 | p.Y371H                 | 97          | positive              | low               |                                              |
| 21                                                                             | 2786 | c.1228-2 A>G            | 95          | positive              | low               |                                              |
| 22                                                                             | 2811 | p.C404R                 | 97          | negative              | low               |                                              |
| 23                                                                             | 2923 | p.C381R                 | 97          | positive              | low               |                                              |
| 24                                                                             | 2985 | p.C381R                 | 93          | negative              | low               |                                              |
| 25                                                                             | 3003 | p.C381R                 | 95          | positive              | low               |                                              |
| 26                                                                             | 3074 | p.Y371H                 | 45          | negative              | low               |                                              |
| 27                                                                             | 3029 | p.C419F                 | 90          | positive              | low               |                                              |
| 28                                                                             | 3082 | c.1098-1 G>T            | 51          | positive              | low               |                                              |
| 29                                                                             | 3080 | p.Y371H                 | 96          | negative              | low               |                                              |
| 30                                                                             | 3102 | p.C284R<br>p.Y371H      | 64<br>33    | positive              | low               |                                              |



| Supplementary Table 3. Mutational data and methylation status of all patients. |      |                |             |                       |                   |                     |
|--------------------------------------------------------------------------------|------|----------------|-------------|-----------------------|-------------------|---------------------|
| Project ID                                                                     | UPN  | CBL Aberration | Tumor VAF % | Germline heterozygous | Methylation group | Additional comments |
| 31                                                                             | 3110 | p.R420P        | 90          | positive              | low               |                     |
| 32                                                                             | 2357 | c.1228-2 A>G   | 91          | positive              | low               |                     |
| 33                                                                             | 2980 | p.M400R        | 100         | positive              | low               |                     |
